# Supplementary material for: Quantifying tourism booms and the increasing footprint in the Arctic with social media data
Source: PubMed Central journal article supplement (PMC6964912; doi:10.1371/journal.pone.0227189), 2020-01-16
Supplement: pone.0227189.s003.pdf [file pone.0227189.s003.pdf]

## S3 Appendix: Global and Arctic Flickr trends

Table S3. Global and Arctic annual trends in Flickr use

| Year | Number of photos uploaded to Flickr globally (billion photos; 10 <sup>8</sup> ) |        | Proportional increase in global Flickr use from 2004 |        | Number of photos uploaded to Flickr in the Arctic (absolute) |        | Percent traffic (n Arctic / n global, %) |        | Sample size <i>Global-bias corrected footprint</i> |        |
|------|---------------------------------------------------------------------------------|--------|------------------------------------------------------|--------|--------------------------------------------------------------|--------|------------------------------------------|--------|----------------------------------------------------|--------|
|      | Summer                                                                          | Winter | Summer                                               | Winter | Summer                                                       | Winter | Summer                                   | Winter | Summer                                             | Winter |
| 2004 | 0.120                                                                           | 0.078  | 1.00                                                 | 1.00   | 1118                                                         | 287    | 0.0093                                   | 0.0037 | 1118                                               | 287    |
| 2005 | 0.328                                                                           | 0.204  | 2.75                                                 | 2.61   | 2725                                                         | 601    | 0.0083                                   | 0.0029 | 992                                                | 330    |
| 2006 | 0.683                                                                           | 0.449  | 5.71                                                 | 5.74   | 7020                                                         | 1377   | 0.0103                                   | 0.0031 | 1229                                               | 241    |
| 2007 | 1.339                                                                           | 0.806  | 11.19                                                | 10.30  | 15041                                                        | 3710   | 0.0112                                   | 0.0046 | 1255                                               | 413    |
| 2008 | 1.604                                                                           | 1.235  | 13.41                                                | 15.78  | 21809                                                        | 6090   | 0.0136                                   | 0.0049 | 1626                                               | 407    |
| 2009 | 1.747                                                                           | 1.424  | 14.61                                                | 18.20  | 24280                                                        | 9004   | 0.0139                                   | 0.0063 | 1662                                               | 551    |
| 2010 | 1.791                                                                           | 1.439  | 14.98                                                | 18.39  | 33410                                                        | 8935   | 0.0187                                   | 0.0062 | 2230                                               | 493    |
| 2011 | 1.948                                                                           | 1.553  | 16.29                                                | 19.84  | 42912                                                        | 14421  | 0.0220                                   | 0.0093 | 2634                                               | 770    |
| 2012 | 1.891                                                                           | 1.533  | 15.81                                                | 19.59  | 64798                                                        | 18201  | 0.0343                                   | 0.0119 | 4098                                               | 1013   |
| 2013 | 2.313                                                                           | 1.539  | 19.35                                                | 19.67  | 76900                                                        | 37272  | 0.0332                                   | 0.0242 | 3975                                               | 2063   |
| 2014 | 2.228                                                                           | 1.789  | 18.64                                                | 22.85  | 68227                                                        | 27500  | 0.0306                                   | 0.0154 | 3661                                               | 1223   |
| 2015 | 2.173                                                                           | 1.807  | 18.17                                                | 23.09  | 74354                                                        | 37200  | 0.0342                                   | 0.0206 | 4091                                               | 1677   |
| 2016 | 2.039                                                                           | 1.707  | 17.05                                                | 21.81  | 81980                                                        | 33966  | 0.0402                                   | 0.0199 | 4807                                               | 1460   |
| 2017 | 1.949                                                                           | 1.687  | 16.30                                                | 21.56  | 51631                                                        | 30103  | 0.0265                                   | 0.0178 | 3168                                               | 1334   |

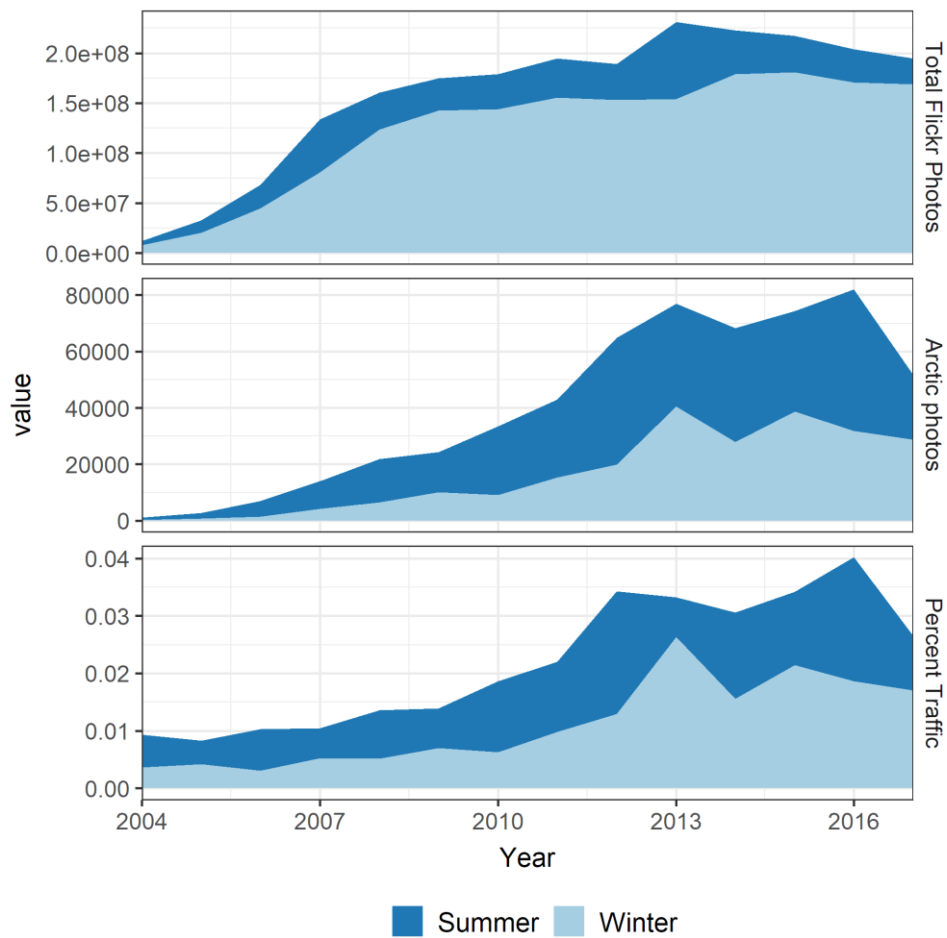

Figure S3 A. Annual number of photos uploaded to Flickr globally and B. in the Arctic C. Arctic photos make up an increasing percentage of global Flickr traffic.

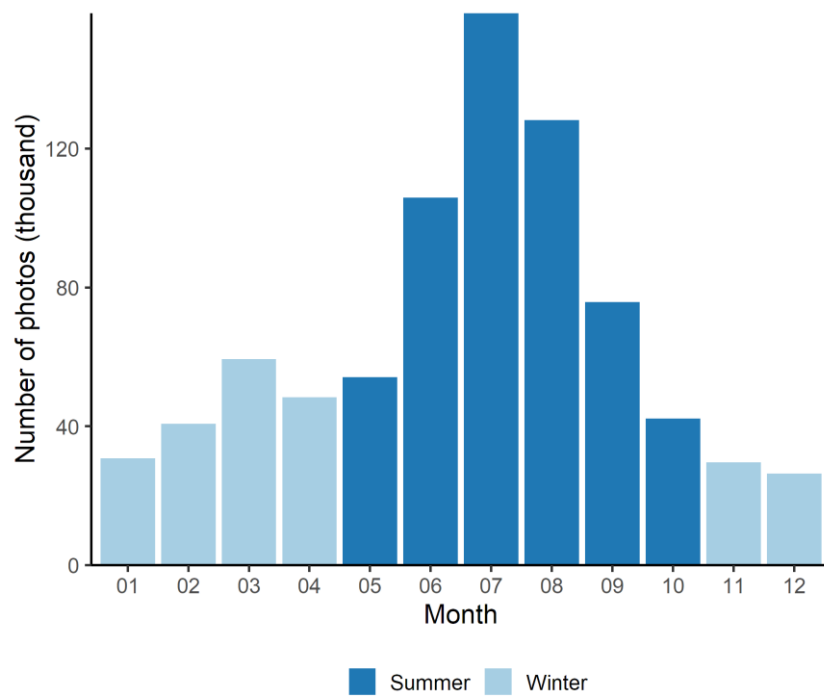

Figure S3 D: Number of photos uploaded to Flickr in the Arctic between 2004 and 2017, by month.
