# Supplementary material for: Quantifying tourism booms and the increasing footprint in the Arctic with social media data
Source: PubMed Central journal article supplement (PMC6964912; doi:10.1371/journal.pone.0227189), 2020-01-16
Supplement: pone.0227189.s007.pdf [file pone.0227189.s007.pdf]

## S1 Table. Comparison with official visitor statistics

Table S5 Comparison between number of photos uploaded to Flickr and statistics on Arctic visitation

| <i>Metric</i>                                                                            | <i>Winter</i>          | <i>Summer</i>          | <i>Source</i>                                                                                                                                                                                                                                                                                                                           |
|------------------------------------------------------------------------------------------|------------------------|------------------------|-----------------------------------------------------------------------------------------------------------------------------------------------------------------------------------------------------------------------------------------------------------------------------------------------------------------------------------------|
| Norway, seasonal visitation foreign and domestic visitors 2005 - 2017, % (guest nights)  | 30.7<br>(1248041<br>7) | 69.3<br>(2816317<br>2) | Statistics Norway (2018) Table 08401: Accommodation establishments total. Guest nights, by guests' country of residence (2005-2018). Available at <a href="https://www.ssb.no/en/statbank/list/overnattin g/">https://www.ssb.no/en/statbank/list/overnattin g/</a> . Accessed 24/09/2018.                                              |
| Norway 2004 -2017, photos                                                                | 31.8                   | 68.2                   |                                                                                                                                                                                                                                                                                                                                         |
| Norway 2004 -2017, puds                                                                  | 36.3                   | 63.7                   |                                                                                                                                                                                                                                                                                                                                         |
| Finland, seasonal visitation foreign and domestic visitors 2004 - 2017, % (guest nights) | 58.1<br>(2760421<br>1) | 41.8<br>(1984397<br>1) | Statistics Finland (2018) Table 002: Visitor arrivals and nights spend in hotels (2004-2017, North Ostrobothnia, Lapland, Kainuu). Available at <a href="https://pxnet2.stat.fi/PXWeb/pxweb/en/StatFi n/">https://pxnet2.stat.fi/PXWeb/pxweb/en/StatFi n/</a> Accessed 25/09/2018.                                                      |
| Finland 2004 – 2017, photos                                                              | 61.3                   | 37.8                   |                                                                                                                                                                                                                                                                                                                                         |
| Finland 2004 – 2017, puds                                                                | 56.8                   | 43.2                   |                                                                                                                                                                                                                                                                                                                                         |
| Faroe Islands, 2016 seasonal visitation all accommodation types, % (bed nights)          | 26.1<br>(41724)        | 73.8<br>(11972)        | Visit Faroe Islands (2016) Annual Report 2016. pp 6. Available at <a href="https://visitfaroeislands.com/content/uploads/2017/06/visitfaroeislandsannualrepor t2016en.pdf">https://visitfaroeislands.com/content/uploads/2017/06/visitfaroeislandsannualrepor t2016en.pdf</a>                                                           |
| Faroe Is. 2016, photos                                                                   | 28.3                   | 71.7                   |                                                                                                                                                                                                                                                                                                                                         |
| Faroe Is. 2016, puds                                                                     | 32.0                   | 68.0                   |                                                                                                                                                                                                                                                                                                                                         |
| Greenland, seasonal visitation foreign visitors 2004 -2017, %                            | 27.6                   | 72.4                   | Statistics Greenland (2018). Table TUXHOT: Overnight stays by region, time, month, unit and nationality (2004-2017, all regions). Available at <a href="http://bank.stat.gl/pxweb/en/Greenland/?rxid=TUXKAP25-09-2018+07%3a05%3a01">http://bank.stat.gl/pxweb/en/Greenland/?rxid=TUXKAP25-09-2018+07%3a05%3a01</a> Accessed 25/09/2018. |
| Greenland, 2004-2017, photos                                                             | 9.0                    | 91.0                   |                                                                                                                                                                                                                                                                                                                                         |
| Greenland, 2004-2017, puds                                                               | 21.2                   | 78.8                   |                                                                                                                                                                                                                                                                                                                                         |
